# Supplementary material for: New Insights into the Estimation of Reproduction Numbers during an Epidemic
Source: MDPI journal article supplement (doi:10.3390/vaccines10111788), 2022-10-25
Supplement: s1 [file s1]

# Supplementary Material for “New Insights to Estimate Reproduction Numbers during an Epidemic”

We derive here Equation (12) of the main text. For any time  $t = 1, \dots, T$ , we get

$$\begin{aligned} Y(t) &= R_t(t)(Y * f_C)(t) \\ &= R_t(t) \sum_{k=1}^t f_C(t-k)Y(k) + R_t(t) \sum_{k=-\infty}^0 f_C(t-k)Y(k) \\ &= R_t(t) \sum_{k=1}^t f_C(t-k)Y(k) + R_t(t) \sum_{k=-\infty}^0 f_C(t-k) \\ &= R_t(t) \sum_{k=1}^t f_C(t-k)Y(k) + R_t(t) \left[ 1 - \sum_{x=0}^{t-1} f_C(x) \right]. \end{aligned}$$

By solving with respect to  $Y(t)$ , we obtain

$$Y(t) = \frac{R_t(t) \sum_{k=1}^{t-1} f_C(t-k)Y(k)}{1 - R_t(t)f_C(0)} + \frac{R_t(t) \left[ 1 - \sum_{x=0}^{t-1} f_C(x) \right]}{1 - R_t(t)f_C(0)}. \quad (12)$$

We now provide the explicit computations to derive the standard estimator  $\hat{R}_t(0)$  given in (13) of the main text.

$$\begin{aligned} \hat{R}_t(0) &= \frac{\sum_{i=-7}^6 R_t(i)(Y * f_C)(i)}{\sum_{i=-7}^6 (Y * f_C)(i)} \\ &= \frac{R_t(0) \sum_{i=-7}^0 (Y * f_C)(i) + \sum_{i=1}^6 R_t(i)(Y * f_C)(i) \pm R_t(0) \sum_{i=1}^6 (Y * f_C)(i)}{\sum_{i=-7}^6 (Y * f_C)(i)} \\ &= \frac{R_t(0) \sum_{i=-7}^6 (Y * f_C)(i) + \sum_{i=1}^6 R_t(i)(Y * f_C)(i) - R_t(0) \sum_{i=1}^6 (Y * f_C)(i)}{\sum_{i=-7}^6 (Y * f_C)(i)} \\ &= R_t(0) + \frac{\sum_{i=1}^6 [R_t(i) - R_t(0)](Y * f_C)(i)}{\sum_{i=-7}^6 (Y * f_C)(i)} = R_t(0) + \frac{\sum_{i=1}^6 [R_t(i) - R_t(0)] \frac{Y(i)}{R_t(i)}}{\sum_{i=-7}^6 \frac{Y(i)}{R_t(i)}}. \quad (13) \end{aligned}$$
